# Supplementary material
Source: PubMed Central journal article supplement (PMC8613172)
Supplement: 40259_2021_502_MOESM1_ESM.pdf [file 40259_2021_502_MOESM1_ESM.pdf]

## **Supplementary Information**

**Efficacy, safety, and immunogenicity of AVT02 versus originator adalimumab in subjects with moderate to severe chronic plaque psoriasis: a multicentre, double-blind, randomised, parallel group, active control, Phase 3 study.**

Steven R. Feldman, Nataliya Reznichenko, Grazyna Pulka, Külli Kingo, George Galdava, Fausto Berti, Joanna Sobierska, Roshan Dias, Eric Guenzi, Hendrik Otto, Halimu N. Haliduola, Richard Kay, Heimo Stroissnig

**BioDrugs 2021**

## **Statistical Analysis**

Therapeutic equivalence was evaluated at Weeks 16, 32, and 50 by providing the two-sided 95% confidence interval (CI) of the differences between the ABP 501 and adalimumab groups. The 95% CIs of the differences were estimated using an ANCOVA model that contained all three treatments and adjusted for baseline scores and stratification factors as covariates. The details of this calculation are as follows: The treatment difference in mean change from baseline in % PASI improvement at Week 16 between ABP 501 and originator adalimumab was - 2.18%. A 95% CI around this treatment difference was calculated to be - 7.39 % to 3.02%. The standard deviation for percentage improvement based on a reverse calculation from the 95% CI is then 24%.

## **Safety Results**

**Laboratory Values Over Time:** No clinically meaningful changes from BL over time were observed across the treatment groups in any haematology, chemistry, and urinalysis values during the study.

**Vital Signs:** No meaningful changes from baseline over time were observed across the treatment groups in vital signs during the study. Across all treatment groups, most assessments had a mean change from baseline that was similar through the study.

**Physical Findings:** No differences were seen in physical examinations

**Electrocardiograms:** No differences were seen in ECG findings. Most ECG interpretations were normal or abnormal NCS at all the timepoints. Most assessments remained as they were assessed at Baseline through the study with minimal changes.

**Table S1** – Sensitivity analysis: MMRM analysis of observed data, and ANCOVA analysis of the per protocol set, measuring percent improvement in PASI from baseline to Week 16.

|                                              | MMRM/ FAS<br>(observed data) |                       | ANCOVA/ PPS      |                       |
|----------------------------------------------|------------------------------|-----------------------|------------------|-----------------------|
|                                              | AVT02<br>N = 205             | Originator<br>N = 207 | AVT02<br>N = 199 | Originator<br>N = 199 |
| n                                            | 201                          | 201                   | 199              | 199                   |
| LS Mean (SE)                                 | 90.3 (1.17)                  | 89.6 (1.32)           | 90.9 (1.22)      | 90.6 (1.25)           |
| LS Mean Difference (SE; AVT02 vs originator) | 0.7 (1.43)                   |                       | 0.3 (1.39)       |                       |
| 90% confidence interval                      | -1.69, 3.03                  |                       | -1.96, 2.62      |                       |
| 95% confidence interval                      | -2.15, 3.49                  |                       | -2.40, 3.06      |                       |

ANCOVA Analysis of Covariance, FAS full analysis set, LS mean least squares mean, MMRM mixed model for repeated measures, n number of evaluable subjects, N number of subjects in treatment group, PASI Psoriasis Area and Severity Index, PPS per protocol set, SE standard error

The two-sided 90% and 95% confidence intervals of the differences of LS means between the AVT02 and originator adalimumab groups are from the MMRM or ANCOVA model including percent improvement as response variable, treatment and two stratification factors as factors and baseline PASI score as explanatory variables (MMRM) or covariate (ANCOVA). An unstructured covariance structure is used to model the within-subject errors. Missing PASI not imputed.

**Table S2** – Change from baseline in %BSA affected by psoriasis evaluation from baseline to Week 16 (full analysis set)

|                      | Change from Baseline |               |        |          |
|----------------------|----------------------|---------------|--------|----------|
|                      | n                    | Mean (SD)     | Median | Min, Max |
| AVT02 (N = 205)      |                      |               |        |          |
| Week 4               | 205                  | -8.1 (10.67)  | -5.0   | -59, 14  |
| Week 8               | 203                  | -18.8 (15.19) | -15.0  | -82, 13  |
| Week 12              | 201                  | -24.3 (16.71) | -21.0  | -82, 25  |
| Week 16              | 201                  | -27.2 (17.10) | -25.0  | -82, 40  |
| Originator (N = 207) |                      |               |        |          |
| Week 4               | 204                  | -8.9 (11.45)  | -5.0   | -74, 6   |
| Week 8               | 203                  | -19.4 (16.02) | -15.0  | -83, 5   |
| Week 12              | 202                  | -24.5 (16.67) | -19.0  | -84, 1   |
| Week 16              | 201                  | -27.7 (17.14) | -22.0  | -82, 0   |

BSA body surface area, n number of evaluable subjects, N number of subjects in treatment group, SD standard deviation

**Table S3** – Percentage and number of subjects achieving PASI 50, PASI 75, PASI 90, and PASI 100 in in Stage 1/ through Week 16 and Stage 2/ Week 16 to Week 54 of the study (full analysis set)

|          | Stage 1 |     |      |            |     |      | Stage 2  |             |     |      |                  |    |       |                       |    |       |
|----------|---------|-----|------|------------|-----|------|----------|-------------|-----|------|------------------|----|-------|-----------------------|----|-------|
|          | AVT02   |     |      | Originator |     |      |          | AVT02/AVT02 |     |      | Originator/AVT02 |    |       | Originator/Originator |    |       |
|          | m       | n   | p    | m          | n   | p    |          | m           | n   | p    | m                | n  | p     | m                     | n  | p     |
| Week 4   |         |     |      |            |     |      | Week 16  |             |     |      |                  |    |       |                       |    |       |
| PASI 50  | 205     | 102 | 49.8 | 204        | 92  | 45.1 | PASI 50  | 197         | 196 | 99.5 | 97               | 97 | 100.0 | 98                    | 98 | 100.0 |
| PASI 75  | 205     | 36  | 17.6 | 204        | 34  | 16.7 | PASI 75  | 197         | 185 | 93.9 | 97               | 90 | 92.8  | 98                    | 88 | 89.8  |
| PASI 90  | 205     | 7   | 3.4  | 204        | 9   | 4.4  | PASI 90  | 197         | 153 | 77.7 | 97               | 81 | 83.5  | 98                    | 77 | 78.6  |
| PASI 100 | 205     | 1   | 0.5  | 204        | 0   | 0    | PASI 100 | 197         | 86  | 43.7 | 97               | 46 | 47.4  | 98                    | 44 | 44.9  |
| Week 8   |         |     |      |            |     |      | Week 24  |             |     |      |                  |    |       |                       |    |       |
| PASI 50  | 203     | 173 | 85.2 | 203        | 186 | 91.6 | PASI 50  | 194         | 190 | 97.9 | 96               | 94 | 97.9  | 96                    | 95 | 99.0  |
| PASI 75  | 203     | 125 | 61.6 | 203        | 133 | 65.5 | PASI 75  | 194         | 182 | 93.8 | 96               | 87 | 90.6  | 96                    | 88 | 91.7  |
| PASI 90  | 203     | 81  | 39.9 | 203        | 78  | 38.4 | PASI 90  | 194         | 157 | 80.9 | 96               | 76 | 79.2  | 96                    | 77 | 80.2  |
| PASI 100 | 203     | 30  | 14.8 | 203        | 25  | 12.3 | PASI 100 | 194         | 99  | 51.0 | 96               | 43 | 44.8  | 96                    | 47 | 49.0  |
| Week 12  |         |     |      |            |     |      | Week 32  |             |     |      |                  |    |       |                       |    |       |
| PASI 50  | 201     | 191 | 95.0 | 202        | 196 | 97.0 | PASI 50  | 184         | 177 | 96.2 | 92               | 89 | 96.7  | 91                    | 87 | 95.6  |
| PASI 75  | 201     | 169 | 84.1 | 202        | 167 | 82.7 | PASI 75  | 184         | 165 | 89.7 | 92               | 85 | 92.4  | 91                    | 82 | 90.1  |
| PASI 90  | 201     | 121 | 60.2 | 202        | 128 | 63.4 | PASI 90  | 184         | 149 | 81.0 | 92               | 69 | 75.0  | 91                    | 75 | 82.4  |
| PASI 100 | 201     | 61  | 30.3 | 202        | 62  | 30.7 | PASI 100 | 184         | 102 | 55.4 | 92               | 41 | 44.6  | 91                    | 46 | 50.5  |
| Week 16  |         |     |      |            |     |      | Week 42  |             |     |      |                  |    |       |                       |    |       |
| PASI 50  | 201     | 197 | 98.0 | 201        | 195 | 97.0 | PASI 50  | 182         | 173 | 95.1 | 91               | 89 | 97.8  | 89                    | 88 | 98.9  |
| PASI 75  | 201     | 185 | 92.0 | 201        | 178 | 88.6 | PASI 75  | 182         | 166 | 91.2 | 91               | 79 | 86.8  | 89                    | 80 | 89.9  |
| PASI 90  | 201     | 153 | 76.1 | 201        | 158 | 78.6 | PASI 90  | 182         | 143 | 78.6 | 91               | 70 | 76.9  | 89                    | 69 | 77.5  |

|          | Stage 1 |    |      |            |    |      | Stage 2  |             |     |      |                  |    |      |                       |    |      |
|----------|---------|----|------|------------|----|------|----------|-------------|-----|------|------------------|----|------|-----------------------|----|------|
|          | AVT02   |    |      | Originator |    |      | PASI 100 | AVT02/AVT02 |     |      | Originator/AVT02 |    |      | Originator/Originator |    |      |
| PASI 100 | 201     | 86 | 42.8 | 201        | 90 | 44.8 |          | PASI 100    | 182 | 96   | 52.7             | 91 | 48   | 52.7                  | 89 | 42   |
|          |         |    |      |            |    |      | Week 50  |             |     |      |                  |    |      |                       |    |      |
|          |         |    |      |            |    |      | PASI 50  | 181         | 174 | 96.1 | 90               | 87 | 96.7 | 87                    | 83 | 95.4 |
|          |         |    |      |            |    |      | PASI 75  | 181         | 163 | 90.1 | 90               | 78 | 86.7 | 87                    | 78 | 89.7 |
|          |         |    |      |            |    |      | PASI 90  | 181         | 143 | 79.0 | 90               | 64 | 71.1 | 87                    | 63 | 72.4 |
|          |         |    |      |            |    |      | PASI 100 | 181         | 90  | 49.7 | 90               | 43 | 47.8 | 87                    | 45 | 51.7 |

*m* number of subjects in treatment group with assessment at both baseline and the specified time point and is used as the denominator for percentage calculations, *n* number of subjects achieving PASI 50, PASI 75, PASI 90 or PASI 100 at time point, *p* percentage of subjects achieving PASI 50, PASI 75, PASI 90 or PASI 100, *PASI* Psoriasis Area and Severity Index

**Table S4** – Change from baseline in sPGA response in Stage 1/ through Week 16 and Stage 2/ Week 16 to Week 54 of the study (full analysis set)

|                                | Change from Baseline |             |        |          |
|--------------------------------|----------------------|-------------|--------|----------|
|                                | n                    | Mean (SD)   | Median | Min, Max |
| <b>Stage 1</b>                 |                      |             |        |          |
| AVT02 (N = 205)                |                      |             |        |          |
| Week 4                         | 205                  | -1.3 (0.88) | -1.0   | -5, 0    |
| Week 8                         | 203                  | -2.2 (1.13) | -2.0   | -5, 0    |
| Week 12                        | 201                  | -2.7 (1.00) | -3.0   | -5, 0    |
| Week 16                        | 201                  | -3.0 (0.99) | -3.0   | -5, 0    |
| Originator (N = 207)           |                      |             |        |          |
| Week 4                         | 204                  | -1.3 (0.85) | -1.0   | -4, 0    |
| Week 8                         | 203                  | -2.3 (1.09) | -2.0   | -5, 0    |
| Week 12                        | 202                  | -2.6 (1.13) | -3.0   | -5, 1    |
| Week 16                        | 201                  | -2.9 (1.02) | -3.0   | -5, 0    |
| <b>Stage 2</b>                 |                      |             |        |          |
| AVT02/AVT02 (N = 197)          |                      |             |        |          |
| Week 24                        | 194                  | -3.0 (1.07) | -3.0   | -5, 0    |
| Week 32                        | 184                  | -2.9 (1.13) | -3.0   | -5, 0    |
| Week 42                        | 182                  | -2.9 (1.17) | -3.0   | -5, 0    |
| Week 50                        | 181                  | -2.9 (1.12) | -3.0   | -5, 0    |
| Originator/AVT02 (N = 97)      |                      |             |        |          |
| Week 24                        | 96                   | -2.8 (1.06) | -3.0   | -5, 1    |
| Week 32                        | 92                   | -2.7 (1.22) | -3.0   | -5, 1    |
| Week 42                        | 91                   | -2.8 (1.09) | -3.0   | -5, 0    |
| Week 50                        | 90                   | -2.7 (1.14) | -3.0   | -5, 0    |
| Originator/originator (N = 98) |                      |             |        |          |
| Week 24                        | 96                   | -3.0 (1.08) | -3.0   | -5, 0    |
| Week 32                        | 91                   | -3.0 (1.12) | -3.0   | -5, 0    |
| Week 42                        | 89                   | -2.9 (1.13) | -3.0   | -5, 0    |
| Week 50                        | 87                   | -2.9 (1.12) | -3.0   | -5, 0    |

*n* number of evaluable subjects, *N* number of subjects in treatment group, *SD* standard deviation, *sPGA* static Physician's Global Assessment

**Table S5** – Percent improvement from baseline in PASI in Stage 2/ Week 16 through Week 50 of the study (full analysis set)

|                                | Change from Baseline |                |        |              |
|--------------------------------|----------------------|----------------|--------|--------------|
|                                | n                    | Mean (SD)      | Median | Min, Max     |
| AVT02/AVT02 (N = 197)          |                      |                |        |              |
| Week 16                        | 197                  | 93.64 (10.041) | 98.25  | 48.3, 100.0  |
| Week 24                        | 194                  | 93.45 (12.906) | 100.00 | 11.3, 100.0  |
| Week 32                        | 184                  | 92.43 (15.542) | 100.00 | 20.0, 100.0  |
| Week 42                        | 182                  | 91.99 (16.502) | 100.00 | -8.7, 100.0  |
| Week 50                        | 181                  | 91.64 (17.792) | 99.62  | -6.4, 100.0  |
| Originator/AVT02 (N = 97)      |                      |                |        |              |
| Week 16                        | 97                   | 94.86 (8.870)  | 98.43  | 55.3, 100.0  |
| Week 24                        | 96                   | 92.83 (12.388) | 98.51  | 40.8, 100.0  |
| Week 32                        | 92                   | 91.25 (17.909) | 97.85  | -19.7, 100.0 |
| Week 42                        | 91                   | 92.20 (14.844) | 100.00 | 23.1, 100.0  |
| Week 50                        | 90                   | 90.75 (15.676) | 98.85  | 21.5, 100.0  |
| Originator/originator (N = 98) |                      |                |        |              |
| Week 16                        | 98                   | 93.68 (9.773)  | 98.93  | 62.1, 100.0  |
| Week 24                        | 96                   | 93.18 (13.558) | 99.13  | 5.3, 100.0   |
| Week 32                        | 91                   | 93.16 (12.989) | 100.00 | 42.9, 100.0  |
| Week 42                        | 89                   | 92.97 (12.048) | 99.23  | 35.1, 100.0  |
| Week 50                        | 87                   | 90.82 (16.598) | 100.00 | 22.0, 100.0  |

*n* number of evaluable subjects, *N* number of subjects in treatment group, *PASI* Psoriasis Area and Severity Index, *SD* standard deviation

**Table S6** – Change from baseline in %BSA affected by psoriasis evaluation in Stage 2/ Week 16 through Week 50 of the study

|                                | Change from Baseline |               |        |          |
|--------------------------------|----------------------|---------------|--------|----------|
|                                | n                    | Mean (SD)     | Median | Min, Max |
| AVT02/AVT02 (N = 197)          |                      |               |        |          |
| Week 24                        | 194                  | -28.4 (16.52) | -26.0  | -82, -2  |
| Week 32                        | 184                  | -28.1 (16.61) | -26.0  | -83, -1  |
| Week 42                        | 181                  | -28.0 (16.79) | -27.0  | -83, 2   |
| Week 50                        | 181                  | -28.1 (17.18) | -26.0  | -83, 2   |
| Originator/AVT02 (N = 97)      |                      |               |        |          |
| Week 24                        | 96                   | -27.3 (18.31) | -21.0  | -83, -2  |
| Week 32                        | 92                   | -28.1 (18.76) | -22.5  | -82, 8   |
| Week 42                        | 91                   | -28.5 (18.11) | -22.0  | -77, -2  |
| Week 50                        | 90                   | -28.1 (17.49) | -22.0  | -75, -2  |
| Originator/originator (N = 98) |                      |               |        |          |
| Week 24                        | 96                   | -29.2 (16.39) | -24.5  | -81, -1  |
| Week 32                        | 91                   | -30.2 (16.42) | -25.0  | -82, -6  |
| Week 42                        | 89                   | -29.4 (16.55) | -24.0  | -82, -8  |
| Week 50                        | 87                   | -29.8 (16.85) | -25.0  | -82, -8  |

BSA body surface area, *n* number of evaluable subjects, *N* number of subjects in treatment group, *SD* standard deviation

**Table S7** – Percent improvement from baseline in PASI in PsA (+) subjects in Stage 1/ through Week 16 of the study (LOCF data)

|                     | Change from Baseline |                |        |             |
|---------------------|----------------------|----------------|--------|-------------|
|                     | n                    | Mean (SD)      | Median | Min, Max    |
| AVT02 (N = 43)      |                      |                |        |             |
| Week 4              | 43                   | 39.55 (25.202) | 41.41  | 0.0, 89.7   |
| Week 8              | 43                   | 74.60 (26.180) | 85.78  | -5.4, 100.0 |
| Week 12             | 43                   | 86.15 (20.289) | 92.26  | -5.4, 100.0 |
| Week 16             | 43                   | 90.19 (19.765) | 96.35  | -5.4, 100.0 |
| Originator (N = 41) |                      |                |        |             |
| Week 4              | 41                   | 43.47 (24.715) | 40.53  | 0.0, 89.5   |
| Week 8              | 41                   | 75.58 (24.194) | 76.47  | 0.0, 100.0  |
| Week 12             | 41                   | 84.20 (21.922) | 95.71  | 0.0, 100.0  |
| Week 16             | 41                   | 86.62 (23.177) | 97.67  | 0.0, 100.0  |

*n* number of evaluable subjects, *N* number of subjects in treatment group, *PASI* Psoriasis Area and Severity Index, *PsA* psoriatic arthritis, *SD* standard deviation



**Table S8** – Percentage of subjects achieving sPGA responses of Clear (0) or Almost Clear (1) over time in PsA (+) subjects in Stage 1/ through Week 16 of the study (full analysis set)

|         | AVT02<br>(N = 43) |    |      | Originator<br>(N = 41) |    |      |
|---------|-------------------|----|------|------------------------|----|------|
|         | m                 | n  | p    | m                      | n  | p    |
| Week 4  | 43                | 6  | 14.0 | 40                     | 8  | 20.0 |
| Week 8  | 43                | 23 | 53.5 | 40                     | 25 | 62.5 |
| Week 12 | 42                | 30 | 71.4 | 40                     | 27 | 67.5 |
| Week 16 | 42                | 37 | 88.1 | 40                     | 32 | 80.0 |

*m* number of subjects in treatment group with PsA with assessment at both baseline and the specified time point and is used as the denominator for percentage calculations, *n* number of subjects achieving sPGA responses of clear (0) or almost clear (1) at time point, *N* number of subjects in treatment group, *p* percentage of subjects achieving sPGA responses of clear (0) or almost clear (1), *PsA* psoriatic arthritis, *SD* standard deviation, *sPGA* static Physician's Global Assessment

**Table S9** – Change from baseline in DLQI in PsA (+) subjects in Stage 1/ through Week 16 (full analysis set)

|                     | Change from Baseline |             |        |          |
|---------------------|----------------------|-------------|--------|----------|
|                     | n                    | Mean (SD)   | Median | Min, Max |
| AVT02 (N = 43)      |                      |             |        |          |
| Week 16             | 42                   | 11.8 (7.40) | 12.0   | -1, 29   |
| Originator (N = 41) |                      |             |        |          |
| Week 16             | 40                   | 11.3 (7.60) | 10.5   | -4, 26   |

*DLQI* Dermatology Life Quality Index, *n* number of evaluable subjects, *N* number of subjects in treatment group, *PsA* psoriatic arthritis, *SD* standard deviation

**Table S10** – Change in baseline in RAPID3 in PsA (+) subjects at Week 12 (full analysis set)

|                     | Change from Baseline |               |        |           |
|---------------------|----------------------|---------------|--------|-----------|
|                     | n                    | Mean (SD)     | Median | Min, Max  |
| AVT02 (N = 43)      |                      |               |        |           |
| Week 12             | 42                   | -2.53 (2.150) | -2.05  | -6.9, 1.0 |
| Originator (N = 41) |                      |               |        |           |
| Week 12             | 39                   | -2.36 (1.838) | -2.10  | -7.3, 0.7 |

*n* number of evaluable subjects, *N* number of subjects in treatment group, *PsA* psoriatic arthritis, *RAPID3* Routine Assessment of Patient Index Data 3, *SD* standard deviation

**Table S11** – Percent improvement from baseline in PASI in PsA (+) subjects in Stage 2/  
Week 16 to Week 50 of the study (full analysis set)

|                                | Change from Baseline |                |        |             |
|--------------------------------|----------------------|----------------|--------|-------------|
|                                | n                    | Mean (SD)      | Median | Min, Max    |
| AVT02/AVT02 (N = 40)           |                      |                |        |             |
| Week 4                         | 40                   | 93.72 (10.187) | 100.00 | 50.3, 100.0 |
| Week 8                         | 38                   | 94.65 (8.772)  | 100.00 | 69.9, 100.0 |
| Week 12                        | 37                   | 96.34 (7.565)  | 100.00 | 62.8, 100.0 |
| Week 16                        | 37                   | 93.83 (14.345) | 100.00 | 29.2, 100.0 |
| Originator/AVT02 (N = 19)      |                      |                |        |             |
| Week 4                         | 19                   | 90.31 (14.654) | 95.83  | 47.3, 100.0 |
| Week 8                         | 18                   | 88.73 (20.930) | 100.00 | 19.0, 100.0 |
| Week 12                        | 18                   | 90.11 (17.222) | 100.00 | 35.1, 100.0 |
| Week 16                        | 17                   | 90.66 (17.713) | 100.00 | 35.1, 100.0 |
| Originator/originator (N = 18) |                      |                |        |             |
| Week 4                         | 18                   | 94.37 (11.615) | 100.00 | 55.5, 100.0 |
| Week 8                         | 17                   | 92.24 (15.802) | 100.00 | 48.2, 100.0 |
| Week 12                        | 17                   | 93.98 (9.991)  | 100.00 | 68.9, 100.0 |
| Week 16                        | 17                   | 90.85 (15.048) | 100.00 | 55.6, 100.0 |

*n* number of evaluable subjects, *N* number of subjects in treatment group, *PASI* Psoriasis Area and Severity Index, *PsA* psoriatic arthritis, *SD* standard deviation
